# Supplementary material for: Snail1-Expressing Fibroblasts in the Tumor Microenvironment Display Mechanical Properties That Support Metastasis
Source: Oxford University Press journal article supplement (doi:10.1158/0008-5472.can-14-1903), 2014-12-09
Supplement: 00085472can141903-sup-133850_1_supp_2648579_nbkwyy.docx [file 00085472can141903-sup-133850_1_supp_2648579_nbkwyy.docx]

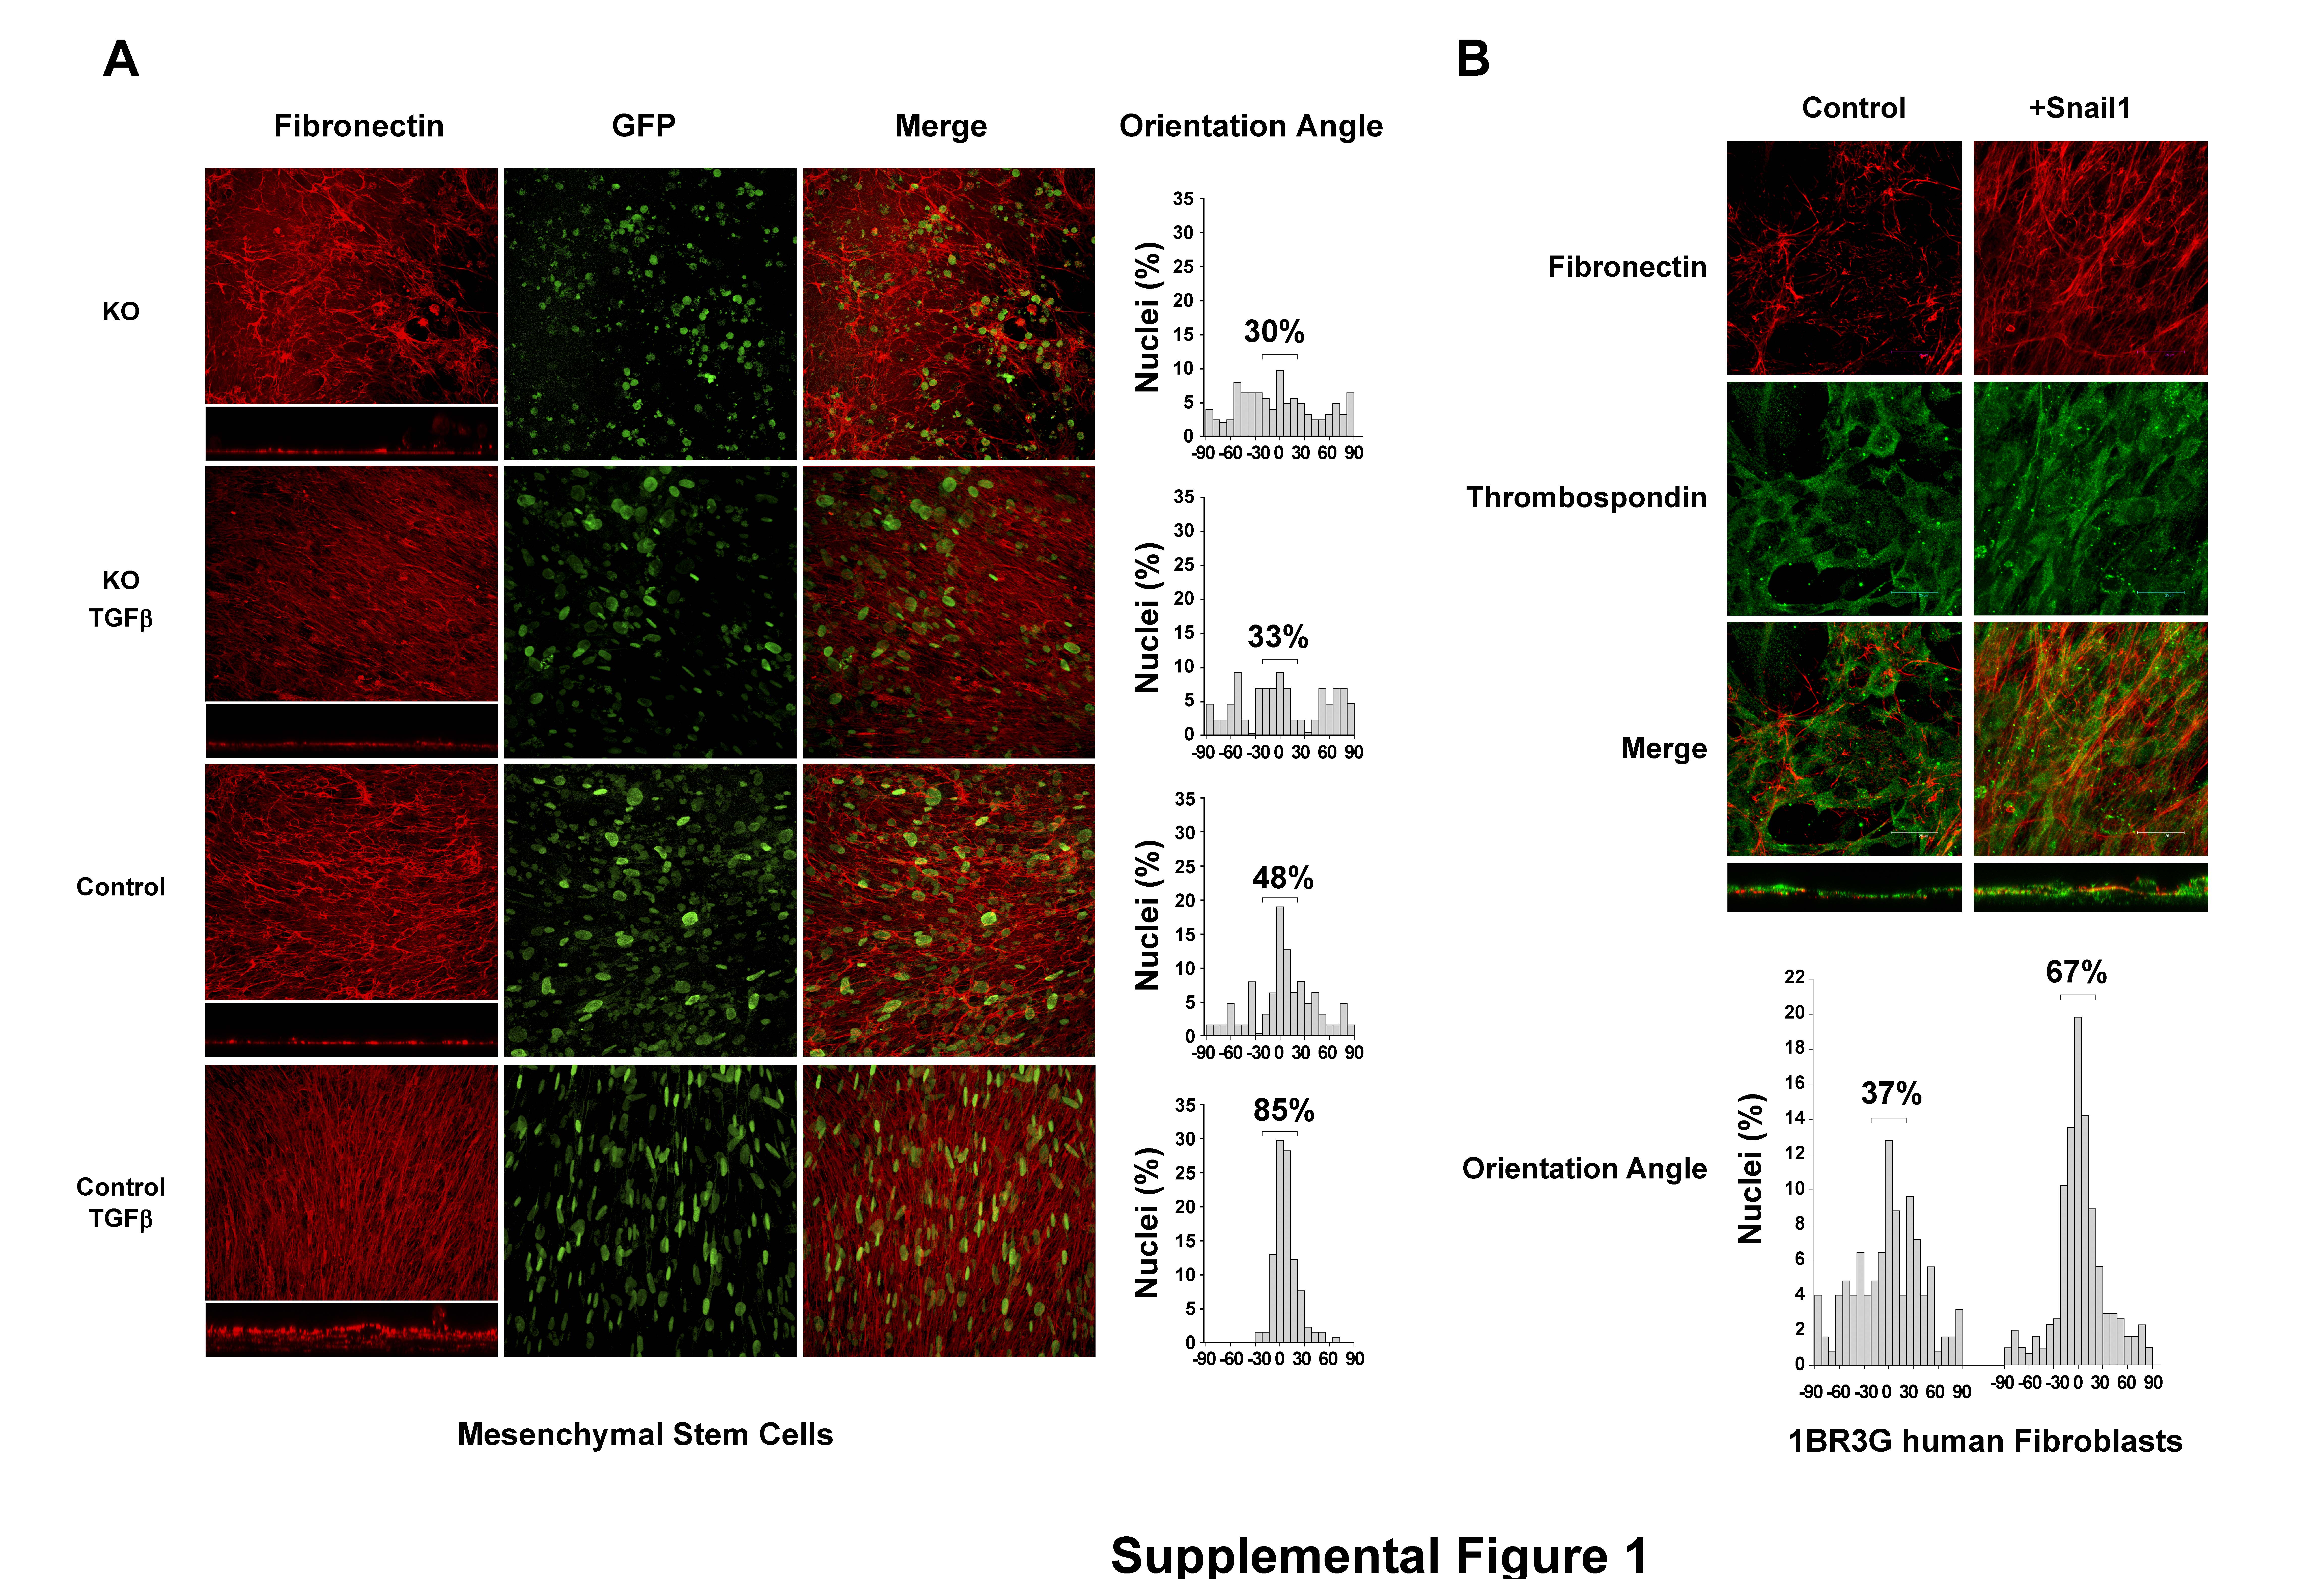
**Supplementary Figure S1.** TGF remodels the ECM generated by mesenchymal stem and 1BR3G cells in a Snail1-dependent manner.

**A,** Fibronectin fibers and nuclei orientation of control or Snail1-depleted mesenchymal stem cells. *Snai1*del/flox mesenchymal stem cells transduced with GFP (control) or CRE-GFP (KO) were grown according to the protocol for generating 3D-ECMs in the presence or absence of 5 ng/ml of TGF. Snail1 depletion was confirmed by Western blot. Fibronectin (red) and nuclei (green; from GFP) were visualized by immunofluorescence. Nuclei orientation distribution was calculated and plotted as in Fig. 1C. **B,** Orientation of nuclei and fibronectin and thrombospondin fibers of control or Snail1 overexpressing 1BR3G human adult fibroblasts. Cells were grown according to the protocol for generating 3D-ECMs in the presence or absence of 5 ng/ml of TGF. Fibronectin (red) and thrombospondin (green) were visualized by immunocytochemistry. Nuclei were stained with DAPI, and nuclei orientation angles were calculated and plotted as in Fig. 1C.

**
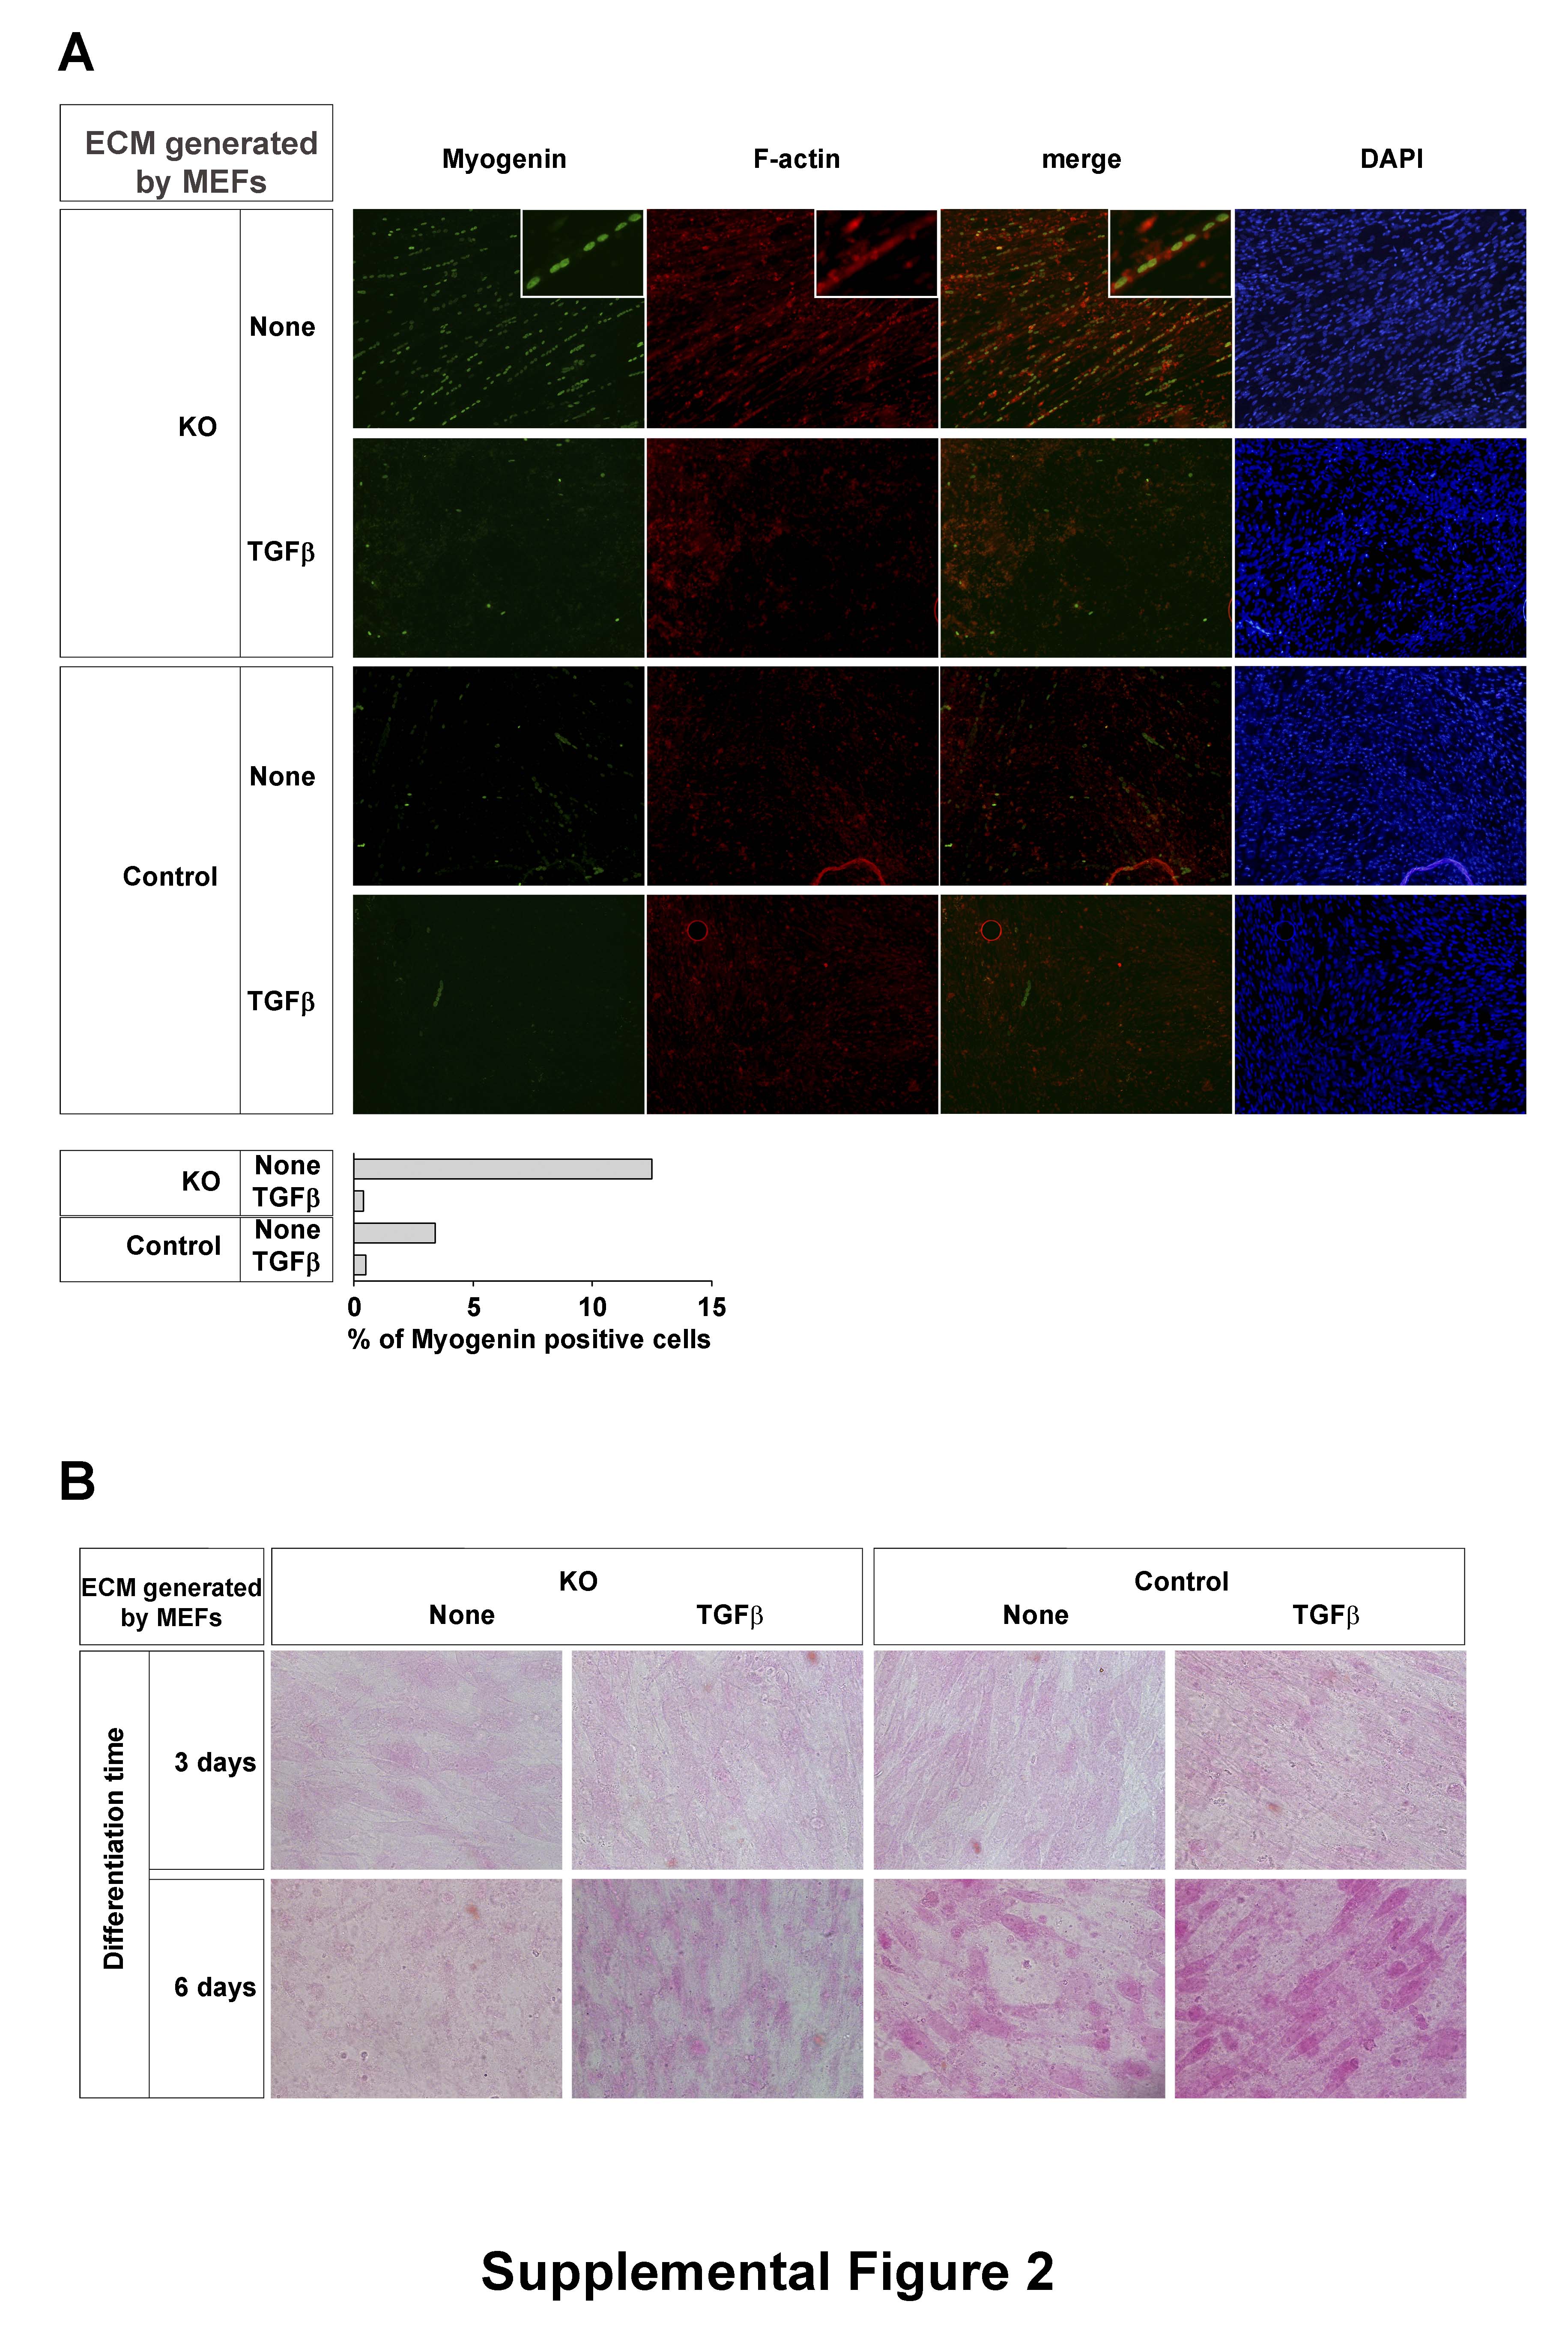
**

**Supplementary Figure S2.** Cell Commitment is Modulated by Fibroblast-derived Matrices in a Snail1-dependent Manner.

**A,** C2C12 myogenic differentiation on fibroblast-derived matrices. C2C12 cells were forced to differentiate toward myogenic lineages on decellularized ECMs from control or *Snail1* KO MEFs treated or not with TGF. Myogenin (green) and F-actin (red) were visualized by immunofluorescence, and nuclei were counterstained with DAPI (blue). The percentage of myogenin-positive cells plotted at the bottom was calculated from a minimum of 1000 cells per condition. While 15% of the C2C12 precursors differentiated towards myogenic lineages on the compliant 3D-ECM generated by *Snai1* KO MEFs, less than 3% of them differentiated on the more rigid matrices. **B,** Osteogenic differentiation of mesenchymal stem cell on fibroblast-derived matrices. Mesenchymal stem cells (MSC) were forced to differentiate towards osteogenic lineages on decellularized ECMs from control or *Snai11* KO MEFs treated or not by TGF. Calcific depositions were visualized by alkaline phosphatase staining after 3 and 6 days. MSCs failed to differentiate to osteogenic lineages on the compliant matrix, while the stiffer matrices were more permissive.


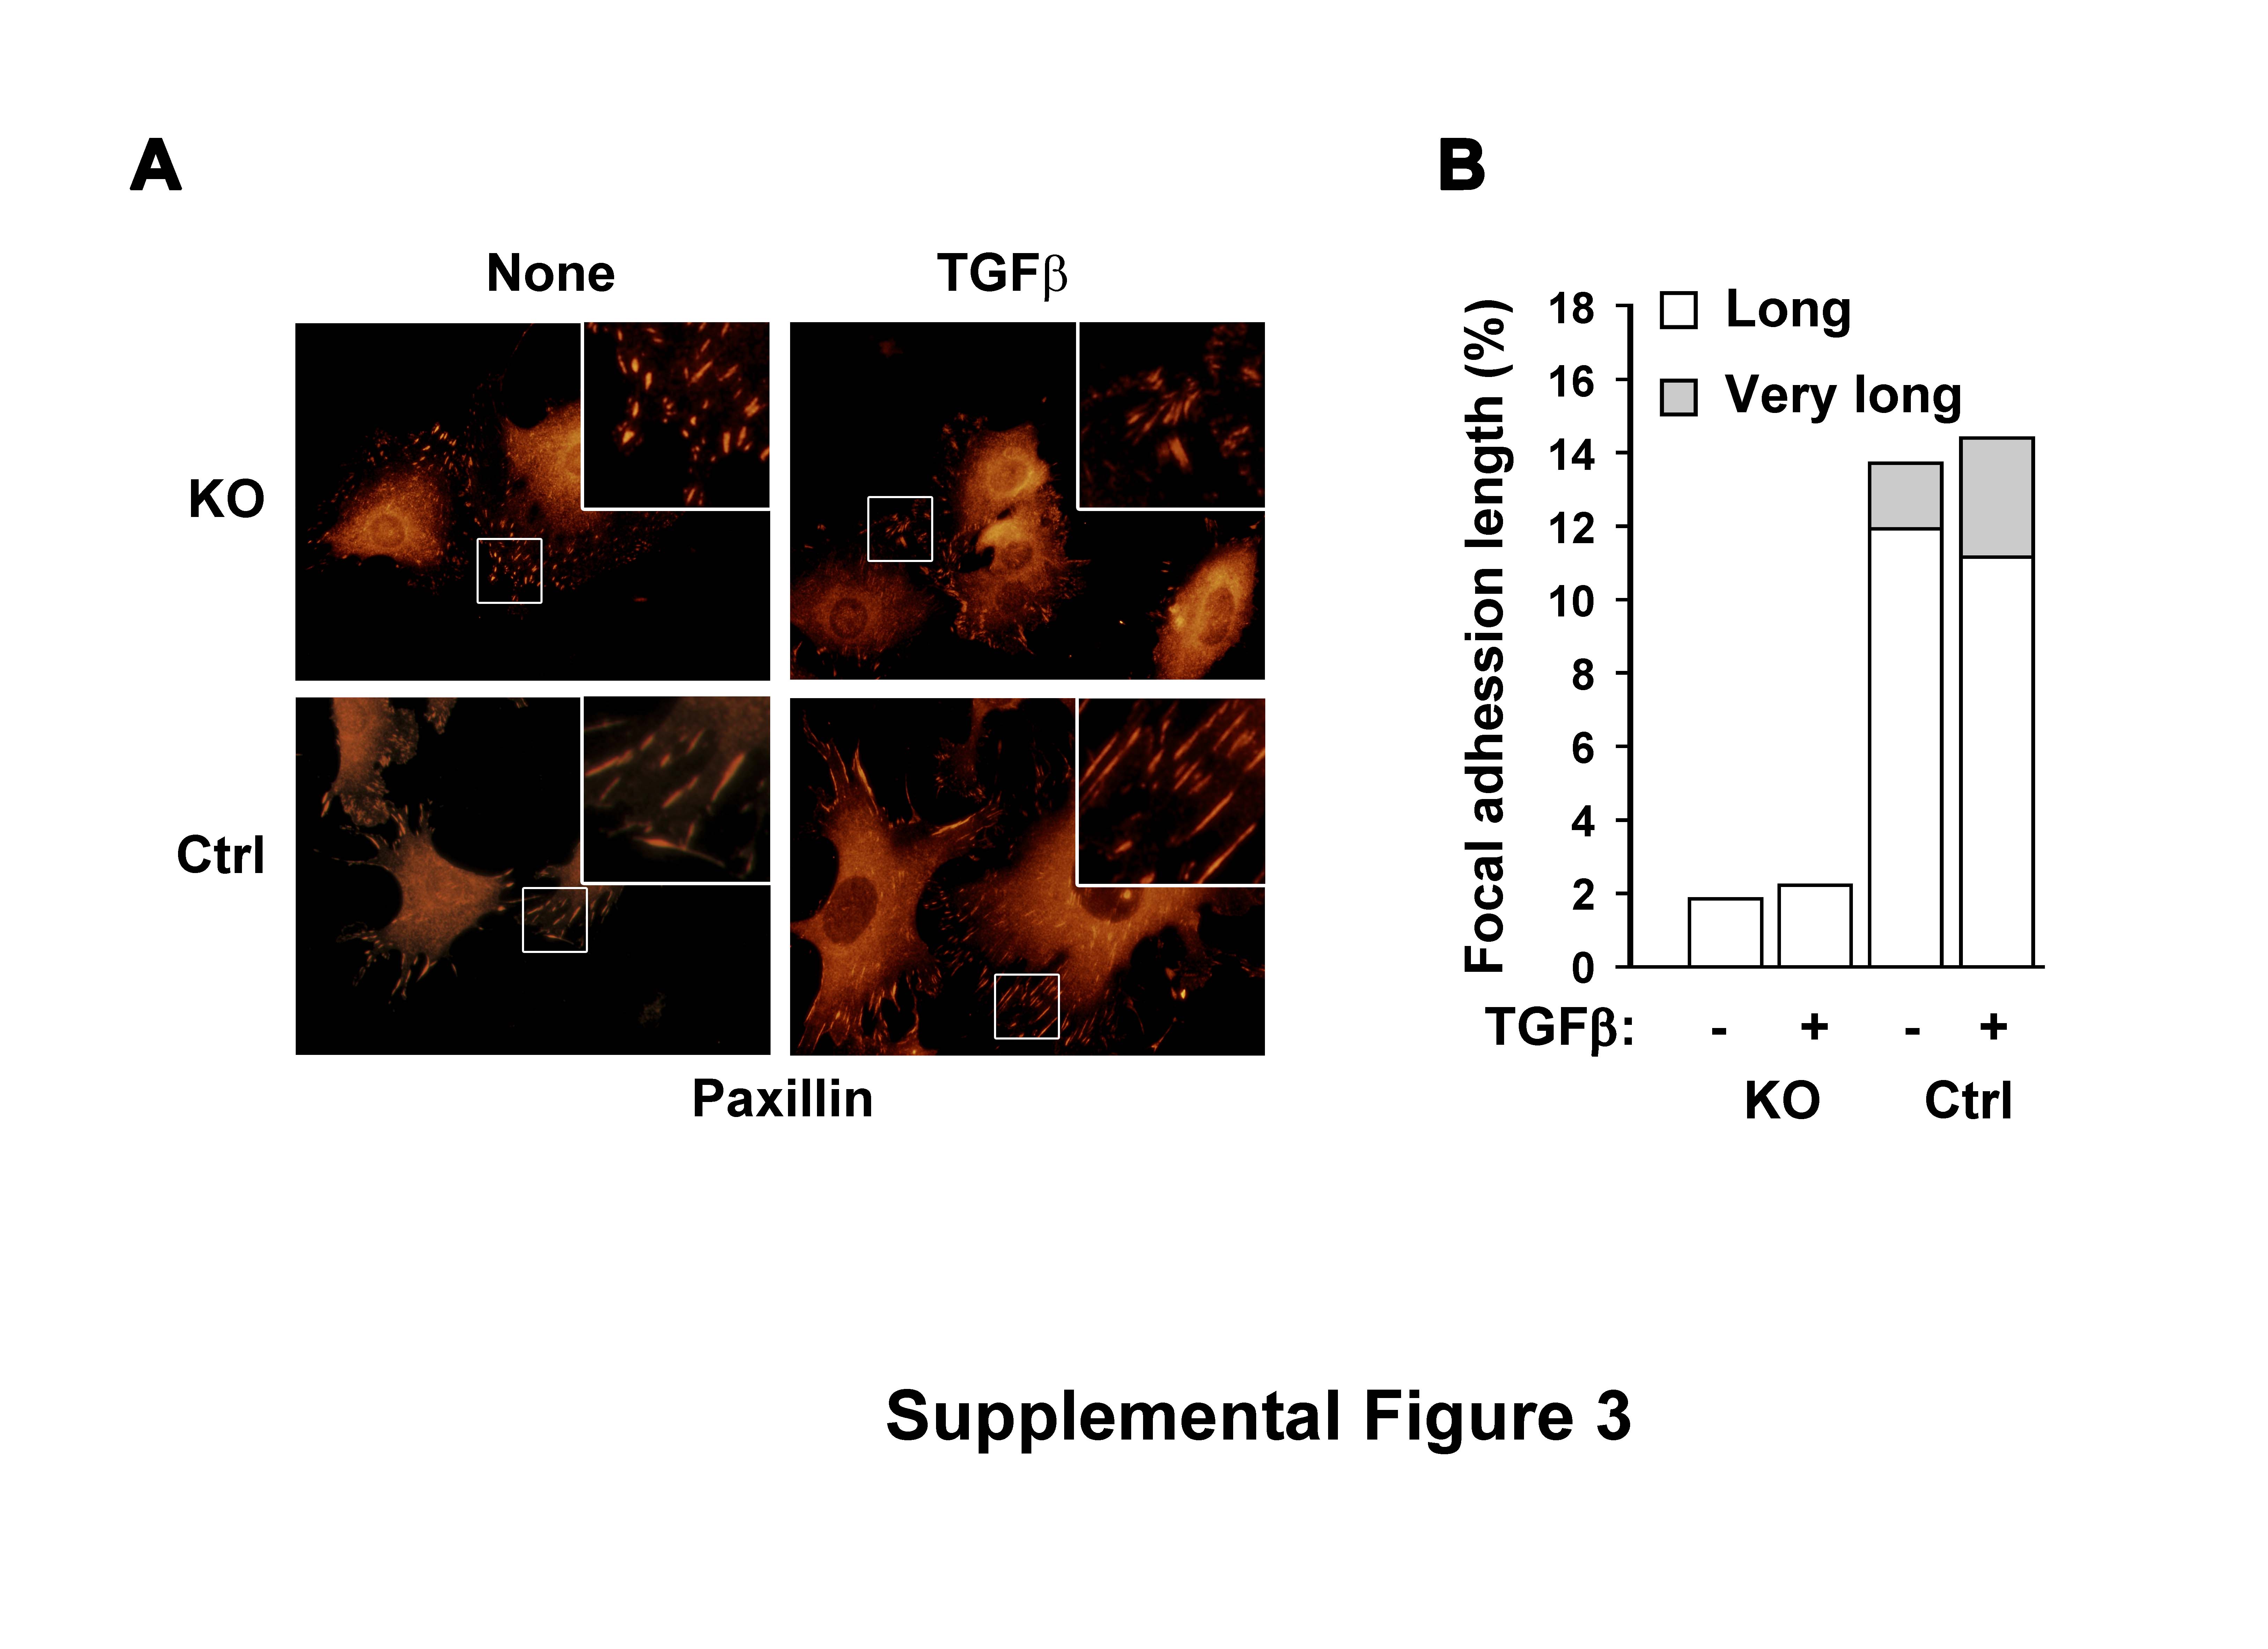


**Supplementary Figure S3.** TGF controls focal contacts in a Snail1-dependent manner.

**A,** Paxillin-stained focal junctions from control and *Snail1* KO MEFs. Paxillin was visualized by immunofluorescence (400×) after 24 hr of culturing the indicated MEFs. Electronic amplification (3×) is shown in boxes. **B,** Focal contacts length. The lengths of the paxillin contacts were measured with ImageJ, and the percentage of contacts in each condition that were long (ranging from 25 to 50% relative to the longest contact) or very long (more than 50%) were plotted.

**Supplementary Figure S4.** TGF regulates N-cadherin intercellular contacts in a Snail1-dependent manner.

**A,** αSMA-positive stress fibers tips co-localize with -catenin. αSMA (green) and -catenin (red) were visualized by immunofluorescence of TGF-treated control MEFs grown for 60 hr on plastic dishes. Nuclei were counterstained with DAPI (blue). Areas in boxes were electronically amplified (2.5×). White arrows point to -catenin co-localizing with αSMA. **B,** N-cadherin intercellular contacts in control and *Snail1* KO MEFs. N-cadherin (green) was visualized by immunofluorescence (400×) in the indicated MEFs grown for 60 hr on plastic dishes. Electronic amplification (3×) is shown in boxes. Length of contacts was measured with ImageJ and classified as short or long contacts, depending if they were shorter or longer than 20% of the longest contact. Red and white arrowheads indicate short and long contacts, respectively. Percentages of short and long contacts in the indicated MEFs are plotted in the right panel. A minimum of 500 contacts per condition were analyzed. **C,** N-cadherin protein levels in control and *Snai11* KO MEFs. N-cadherin protein levels were quantified from total cell extracts obtained from the indicated MEFs treated or not with TGF5ng/ml for 60 hr). Pyruvate kinase was analyzed as a loading control. **D**, N-cadherin and ectopic Snail1 protein levels in rescue experiments. Levels of indicated proteins were measured by Western blot from total cell extracts of KO MEFs stability expressing a mouse Snail1-P2A (dead mutant) or Snail1-SA (active mutant) treated as in **C**. Ectopic mutants were detected with an anti-Snail1 that gives no signal in KO cells (as shown in Figure 2B).


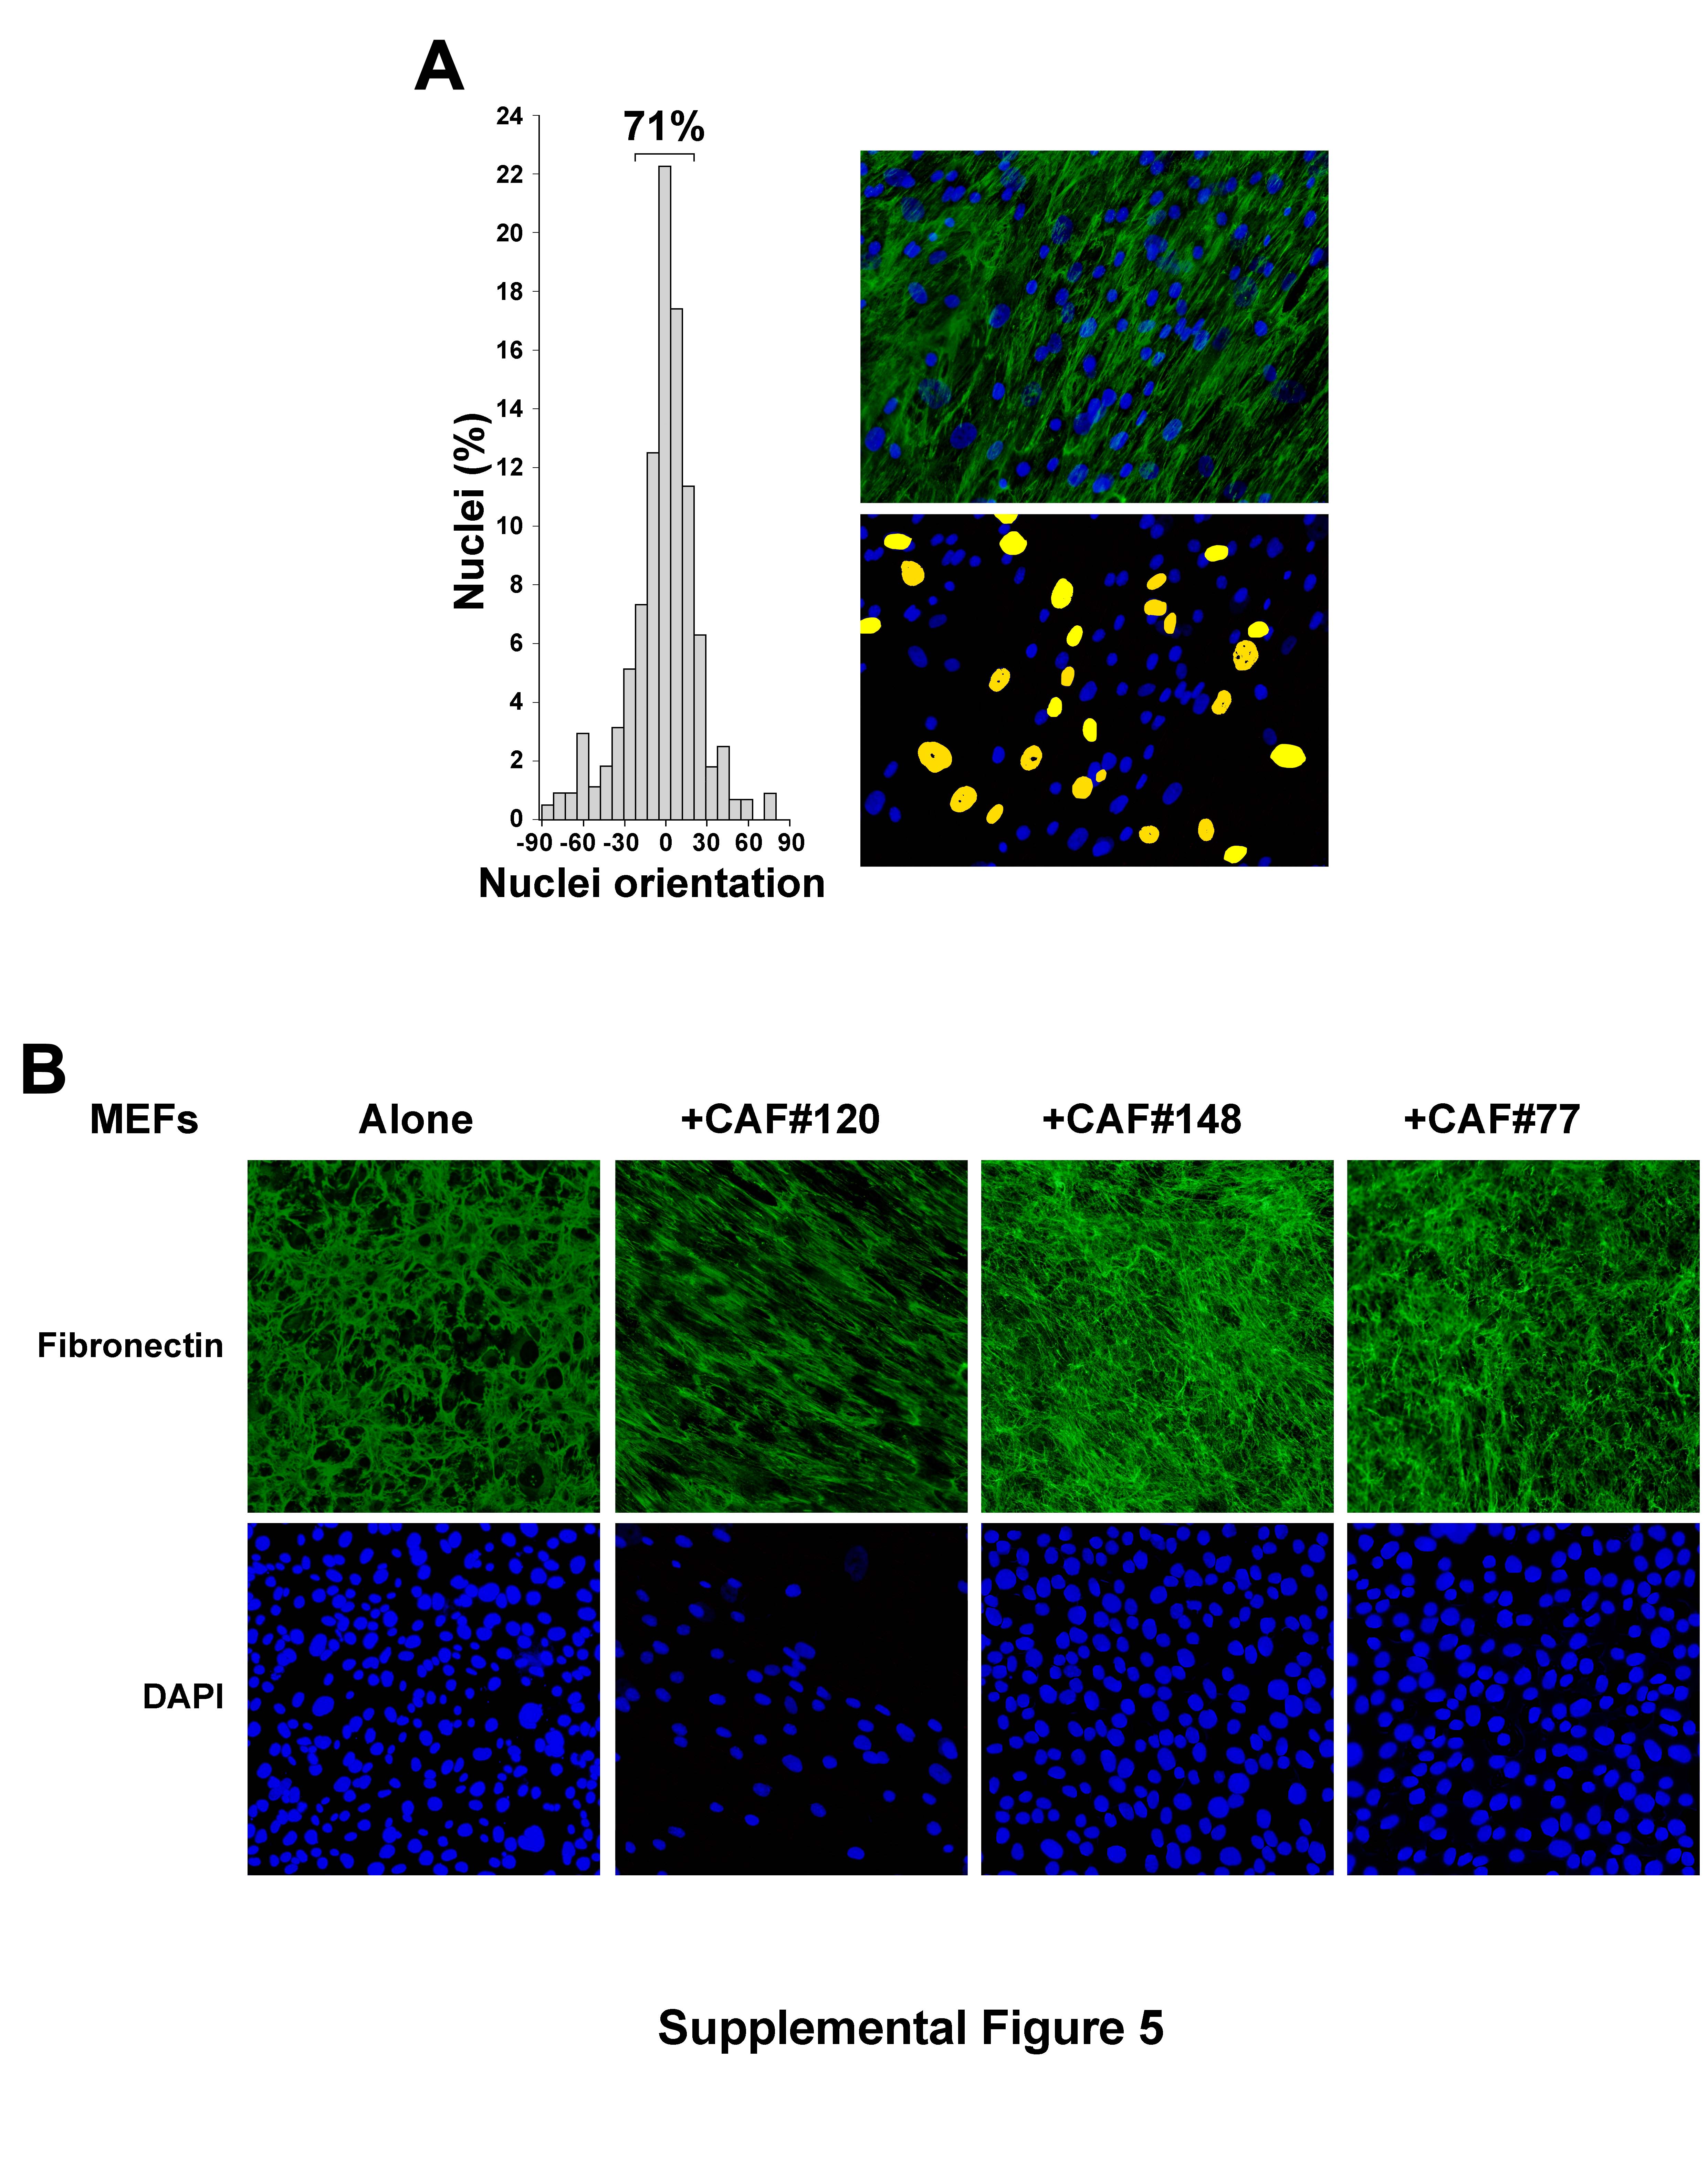


**Supplementary Figure** S**5.** Alignment of MEFs bo-cultured with CAFs.

**A,** MEF nuclei align in the presence of CAFs. Control MEFs (70%) and CAF #120 (30%) were co-cultured according to the standard protocol for generating ECMs. Fibronectin (green) was visualized by immunofluorescence, and nuclei were counterstained with DAPI. In contrast to murine MEFs nuclei, human CAFs nuclei (highlighted in yellow) did not present chromocenter staining (DAPI dots) and could be discarded from the analysis (ImageJ). Nuclei orientation angles of MEFs were calculated and plotted as in Fig. 1C. **B,** MEF nuclei and fibronectin fibers in cocultures of MEFs with CAF lines. Fibronectin (green) was visualized by immunofluorescence, and nuclei were visualized with DAPI, from co-cultures of control MEFs and the indicated CAF lines (to a final amount of about 30%) grown according to the standard protocol for generating 3D-ECMs. CAF nuclei were deleted as indicated in A.

**Supplementary Table S1.** Baseline Characteristics According to Snail1 Expression in the Stroma

**Supplementary Table S2.** Overall Survival Analysis in Patients with Snail1 Expression in Stroma

**Supplementary Table S3.** Antibodies Used for Protein Analysis

| Against | Species | Source | Catalog number |
| --- | --- | --- | --- |
| pyruvate kinase | goat | Chemicon | AB1236 |
| HA | rat | Roche | 1867431 |
| fibronectin | rabbit | Dako | A0245 |
| Snail1 | mouse | Hybridoma | – |
| thrombospondin | mouse | ABCAM | AB1823 |
| LOX | rabbit | ABCAM | AB31238 |
| αSMA | mouse | Sigma | A2547 |
| N-cadherin | rabbit | ABCAM | AB76011 |
| paxilin | mouse | TD labs | P13520 |
| myogenin | hybridoma | From P. Muñoz lab. (Univeristat Pompeu Fabra, Barcelona) | F30 |
| -catenin | mouse | TB labs | 65394 |
| RhoA | mouse | Santa Cruz | sc-418 |
